# Supplementary material for: Effects of sub-chronic amylin receptor activation on alcohol-induced locomotor stimulation and monoamine levels in mice
Source: PubMed Central journal article supplement (PMC7561575; doi:10.1007/s00213-020-05607-8), 2020-07-10
Supplement: 213_2020_5607_MOESM1_ESM.pdf [file 213_2020_5607_MOESM1_ESM.pdf]

# Supplementary Figure 1

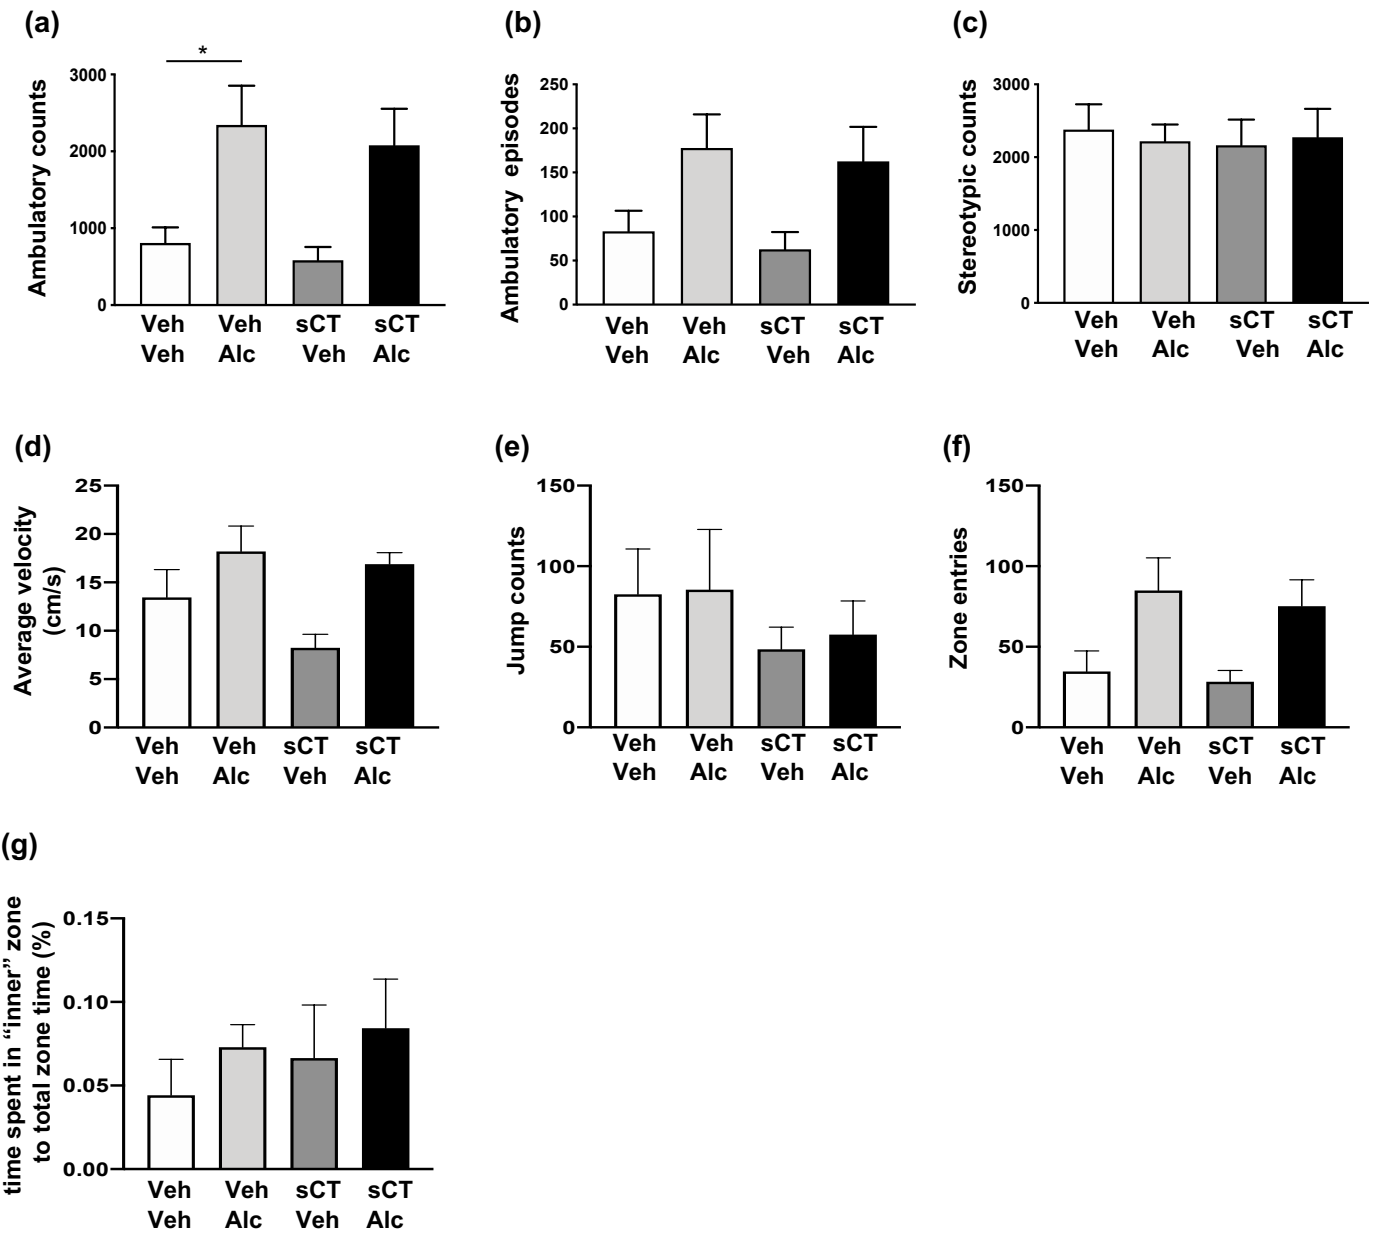

**Supplementary Figure 1. Effects of repeated sCT pre-treatment and acute alcohol challenge on secondary behavioural parameters in the locomotor activity experiment in male mice.**

**(a)** There was an overall effect of alcohol treatment ( $F(1, 28)=16.40, P=0.0004$ ), but not of sCT pre-treatment ( $F(1, 28)=0.43, P=0.5184$ ) or treatment interaction ( $F(1, 28)=0.003, P=0.957$ ) on ambulatory counts. Post hoc analysis showed that alcohol increased ambulatory counts in mice pre-treated with vehicle when compared to the vehicle group ( $P=0.0340$ ). **(b)** An overall effect of alcohol ( $F(1, 28)=9.66, P=0.0043$ ), but not of pre-treatment ( $F(1, 28)=0.33, P=0.5708$ ), or treatment interaction ( $F(1, 28)=0.007, P=0.9353$ ) was noted on ambulatory episodes. **(c)** No effect of pre-treatment ( $F(1, 28)=0.06, P=0.8121$ ), alcohol ( $F(1, 28)=0.005, P=0.9445$ ), or their interaction ( $F(1, 28)=0.16, P=0.6912$ ) was noted on stereotypic counts. **(d)** There was an overall effect of alcohol ( $F(1, 28)=9.65, P=0.0043$ ), but not of sCT pre-treatment ( $F(1, 28)=2.28, P=0.1424$ ) or their interaction ( $F(1, 28)=0.82, P=0.3722$ ) on average velocity. **(e)** No effect of pre-treatment ( $F(1, 28)=1.36, P=0.2528$ ), alcohol ( $F(1, 28)=0.05, P=0.8250$ ) or their interaction ( $F(1, 28)=0.01, P=0.9092$ ) was noted on jump counts. **(f)** There was an overall effect of alcohol ( $F(1, 28)=10.55, P=0.0030$ ), but not of sCT ( $F(1, 28)=0.29, P=0.5940$ ) or treatment interaction ( $F(1, 28)=0.01, P=0.9109$ ) on zone entries. Lastly, **(g)** sCT pre-treatment ( $F(1, 28)=0.45, P=0.5074$ ), alcohol ( $F(1, 28)=0.86, P=0.3623$ ) or treatment interaction ( $F(1, 28)=0.05, P=0.8303$ ) had no effect on the time the mice spent in the "inner" zone to the total zone time in the arena. Two-way ANOVA analysis with results shown as  $F(DFn, DFd)$ ,  $*P<0.05$ , data are represented in the graphs as mean  $\pm$  SEM.
