# Supplementary material for: Effects of sub-chronic amylin receptor activation on alcohol-induced locomotor stimulation and monoamine levels in mice
Source: PubMed Central journal article supplement (PMC7561575; doi:10.1007/s00213-020-05607-8), 2020-07-10
Supplement: 213_2020_5607_MOESM2_ESM.pdf [file 213_2020_5607_MOESM2_ESM.pdf]

## Supplementary Figure 2

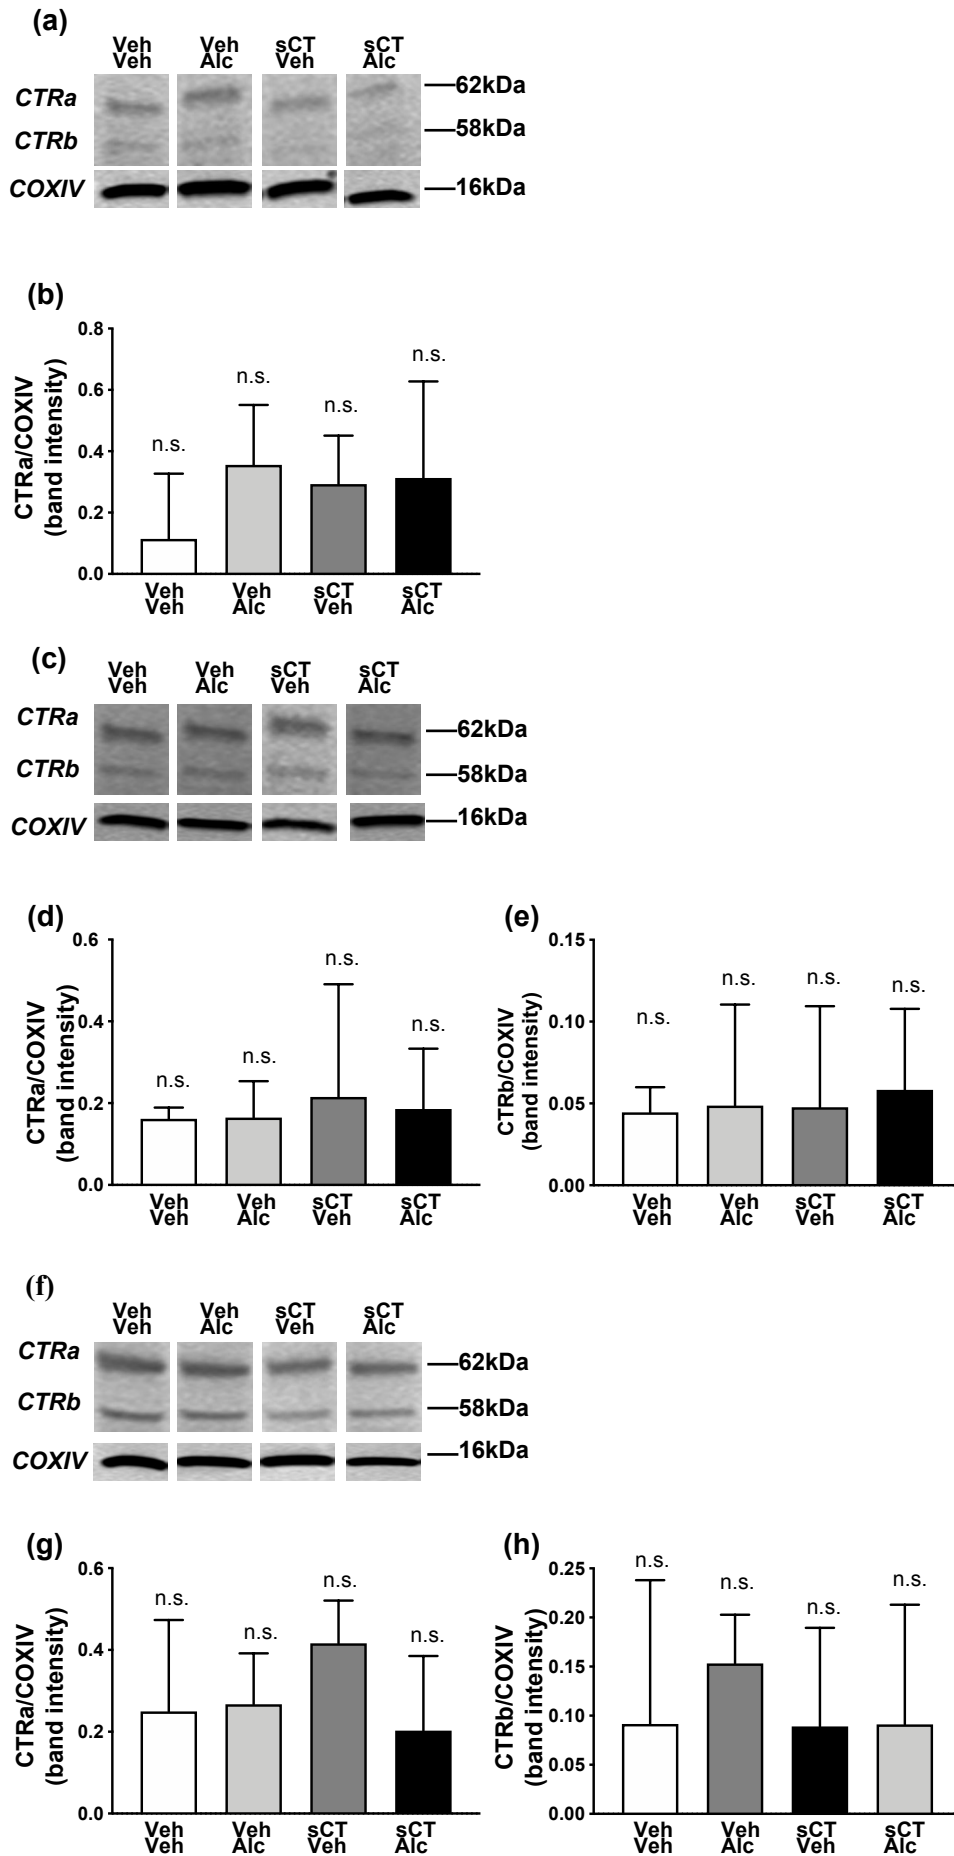

**Supplementary Figure 2. Discontinuation of sub-chronic sCT pre-administration and acute alcohol administration do not affect CTR levels in reward-related areas in mice**

Repeated sCT pre-administration (5  $\mu$ g/kg, IP) for 5 days and an alcohol (1.75 g/kg, IP) injection on day 7 after sCT discontinuation, does not affect the levels of (a, b) CTRa in the LDTg, (c, d) CTRa and (c, e) CTRb in the VTA and (f, g) CTRa and b in the NAc (f, h) in the mice from the behavioural locomotion experiments. (Data are presented as mean  $\pm$ SEM of relative intensity, n.s.: non-significant; Veh: vehicle, Alc: alcohol)
