# Supplementary material for: Effects of sub-chronic amylin receptor activation on alcohol-induced locomotor stimulation and monoamine levels in mice
Source: PubMed Central journal article supplement (PMC7561575; doi:10.1007/s00213-020-05607-8), 2020-07-10
Supplement: 213_2020_5607_MOESM3_ESM.pdf [file 213_2020_5607_MOESM3_ESM.pdf]

### Supplementary Figure 3

**(a)**

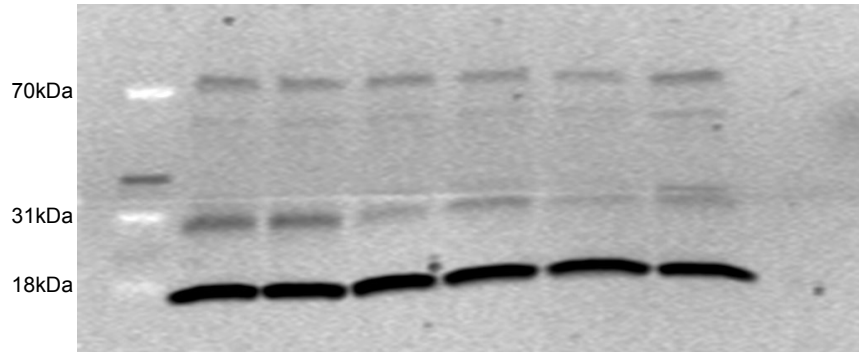

**(b)**

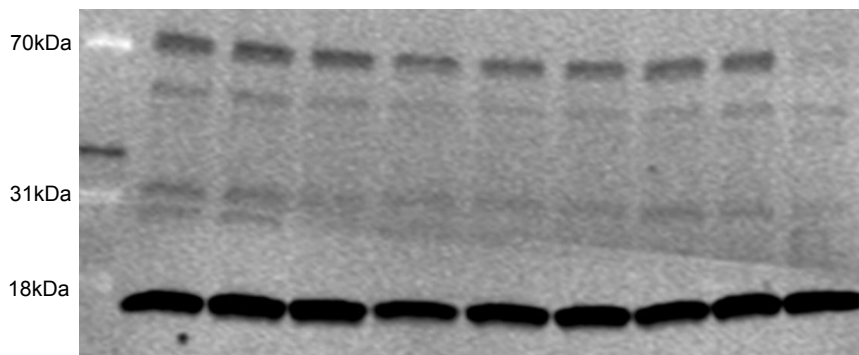

**(c)**

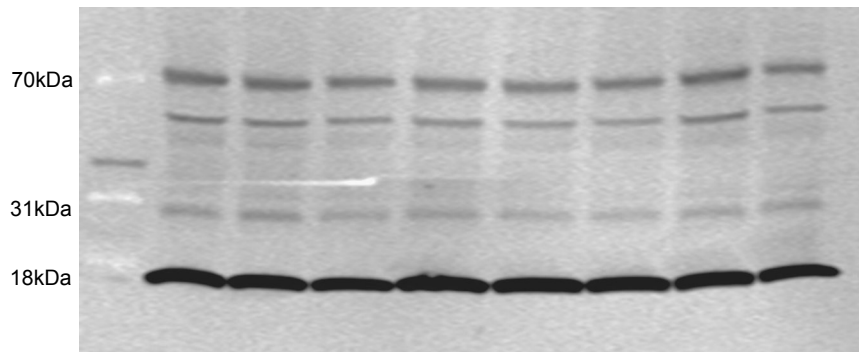

### Supplementary Figure 3. Representative membranes from the Western Blot experiments

Visualised Western Blot gel membranes for **(a)** LDTg, **(b)** VTA and **(c)** NAc.
